# Supplementary material for: Identification, localization, and relative quantitation of pseudouridine in RNA by tandem mass spectrometry of hydrolysis products
Source: PubMed Central journal article supplement — Int J Mass Spectrom. 2011 Jul 1;304(2-3):91–7. doi: 10.1016/j.ijms.2010.05.024 (PMC3180913; doi:10.1016/j.ijms.2010.05.024), 2011-07-01
Supplement: mmc1.pdf [file mmc1.pdf]

## **SUPPLEMENTARY MATERIAL**

### **Identification, localization, and relative quantitation of pseudouridine in RNA by tandem mass spectrometry of hydrolysis products**

Monika Taucher, Barbara Ganisl, and Kathrin Breuker\*

Institute of Organic Chemistry and Center for Molecular Biosciences (CMBI), University of Innsbruck, Innrain 52a, A-6020 Innsbruck, Austria

\* Address reprint requests to Kathrin Breuker, Institute of Organic Chemistry and Center for Molecular Biosciences (CMBI), University of Innsbruck, Innrain 52a, A-6020 Innsbruck, Austria, phone: ++43 512 507 5240, fax ++43 512 507 2892



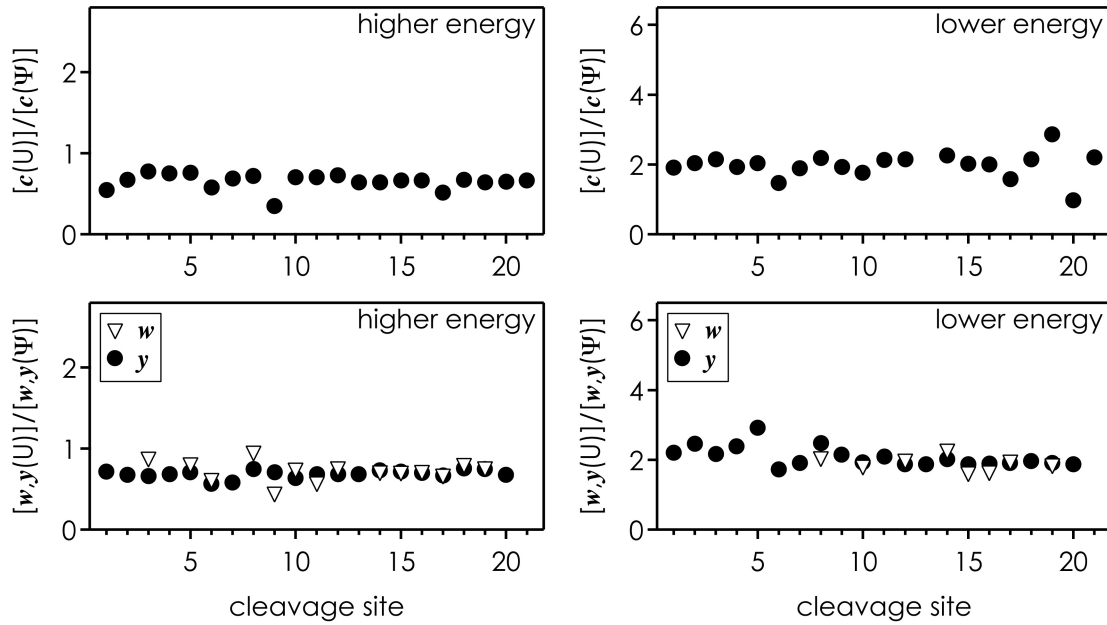

**Figure S2:** Ratio of  $c$ ,  $y$ , and  $w$  ion yields from CAD of  $(M - 5H)^{5-}$  ions of U- and  $\Psi$ -sequences versus cleavage site, higher collision energy is 85 eV, lower collision energy is 70 eV.

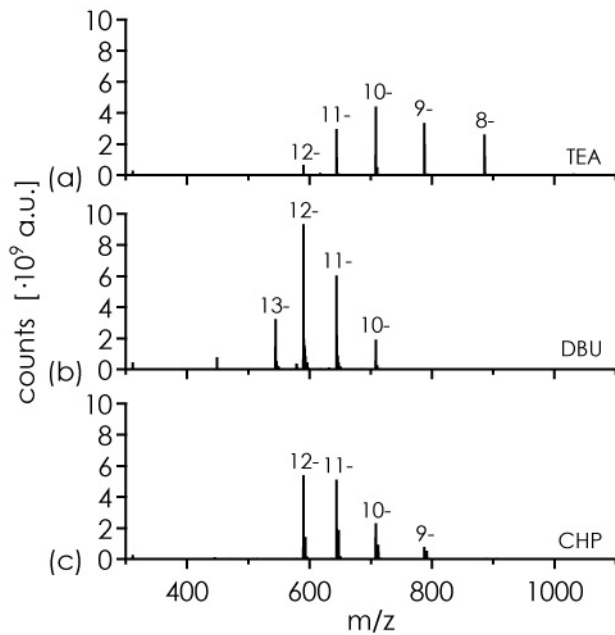

**Figure S3:** ESI-MS spectra of 22 nt RNA (U-sequence, 1  $\mu$ M in 1:1  $H_2O/CH_3OH$ ) with (a) 1% Vol. TEA, (b) 0.1% Vol. DBU, and (c) 20 mM CHP.
